# Supplementary material
Source: PubMed Central journal article supplement (PMC4945498)
Supplement: NIHMS781249-supplement-Supp_Fig_S1.pdf [file NIHMS781249-supplement-Supp_Fig_S1.pdf]

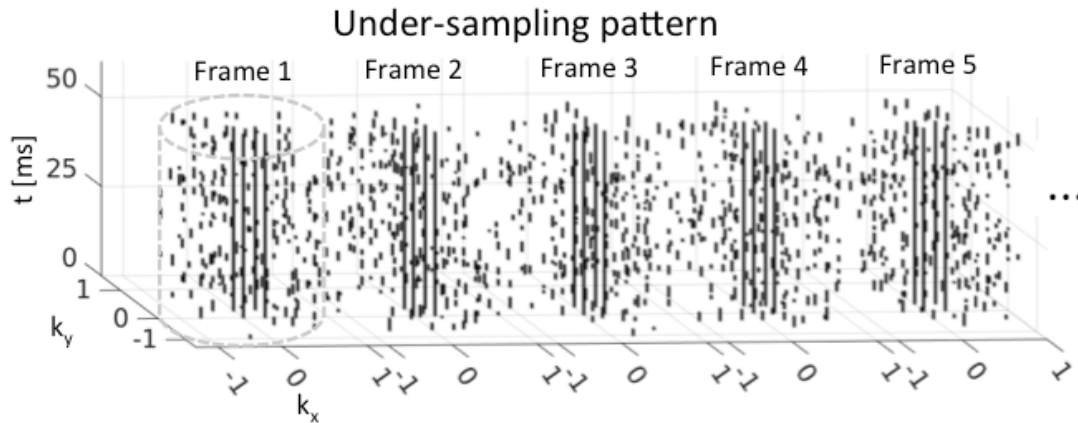

**Supporting Figure S1** The 3D undersampling patterns for the first five frames. The undersampling factor was 3.8. All 3D undersampling patterns were on Cartesian grids and confined within a cylindrical boundary (dashed line on frame 1) in  $k_x$ - $k_y$ - $t$  space. For each frame, the undersampling scheme consisted of 14 phase encodings (i.e., 14 excitations). Among them, 10 phase encodings followed the random walk trajectories in  $k_x$ - $k_y$ - $t$  space with stochastic time delays. The other 4 phase encodings fully sampled the  $t$  dimension of the center  $k_x$ - $k_y$  plane. For different frames, the 3D undersampling patterns were all independently generated to create randomness along the frame dimension. Note that such undersampling patterns allowed randomness in all dimensions.
