# Supplementary material
Source: PubMed Central journal article supplement (PMC4945498)
Supplement: NIHMS781249-supplement-Supp_Fig_S2.pdf [file NIHMS781249-supplement-Supp_Fig_S2.pdf]

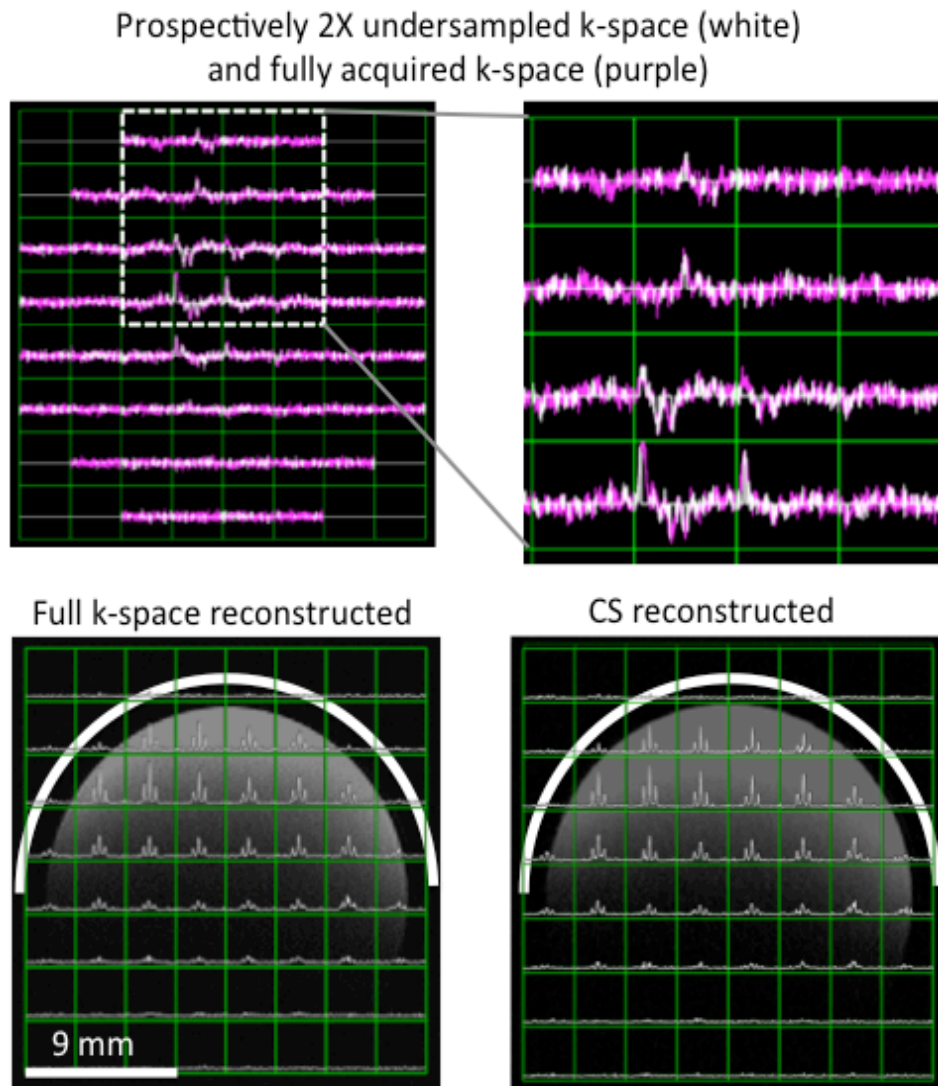

**Supporting Figure S2** Methods: The phantom experiment was performed on a 7T whole-body MRI scanner (GE Healthcare, Waukesha, WI). An RF surface coil was used for both transmission and reception. The thermal  $^{13}\text{C}$  phantom was made using a 21.7 mm diameter cylinder syringe filled with ethylene glycol ( $\text{HOCH}_2\text{CH}_2\text{OH}$ , anhydrous, 99.8%, Sigma-Aldrich, St. Louis, Missouri). A gradient-echo  $^1\text{H}$  image was acquired with TE/TR = 2.5/100 ms, nominal flip angle =  $30^\circ$ , FOV =  $80 \times 80 \text{ mm}^2$ , matrix size =  $256 \times 128$  (zero filled to  $256 \times 256$ ). and slice thickness = 3 mm. 2D dynamic

MRSI scans with circular full k-space coverage and prospective two-fold undersampling were both performed with TE/TR = 2.9/80 ms, flip angle = 20°, FOV = 3 × 3 mm<sup>2</sup>, matrix size = 8 × 8, slice thickness = 20 mm, no averages, readout bandwidth = 10000 Hz, and 5 frames. Results: The top panel shows a prospectively two-fold undersampled k-space (white) overlaid on another fully acquired k-space (purple). The bottom panel shows the full k-space and CS reconstructed spectra. The voxel-wise signal intensities of undersampled k-space data were linearly correlated with those of the full k-space data (slope = 1.02 and R<sup>2</sup> = 0.94 across 31 voxels in abovementioned two datasets), confirming the feasibility of the proposed method. The triplet spectra of ethylene glycol (J<sub>C-H</sub> = 150 Hz) were well recovered by our method. The two bright bold lines indicate the location of the surface <sup>13</sup>C RF transceiver coil used.
